# Supplementary material for: SHISA3, an antagonist of the Wnt/β-catenin signaling, is epigenetically silenced and its ectopic expression suppresses growth in breast cancer
Source: PubMed Central journal article supplement (PMC7373276; doi:10.1371/journal.pone.0236192), 2020-07-21

**Figure 2A**

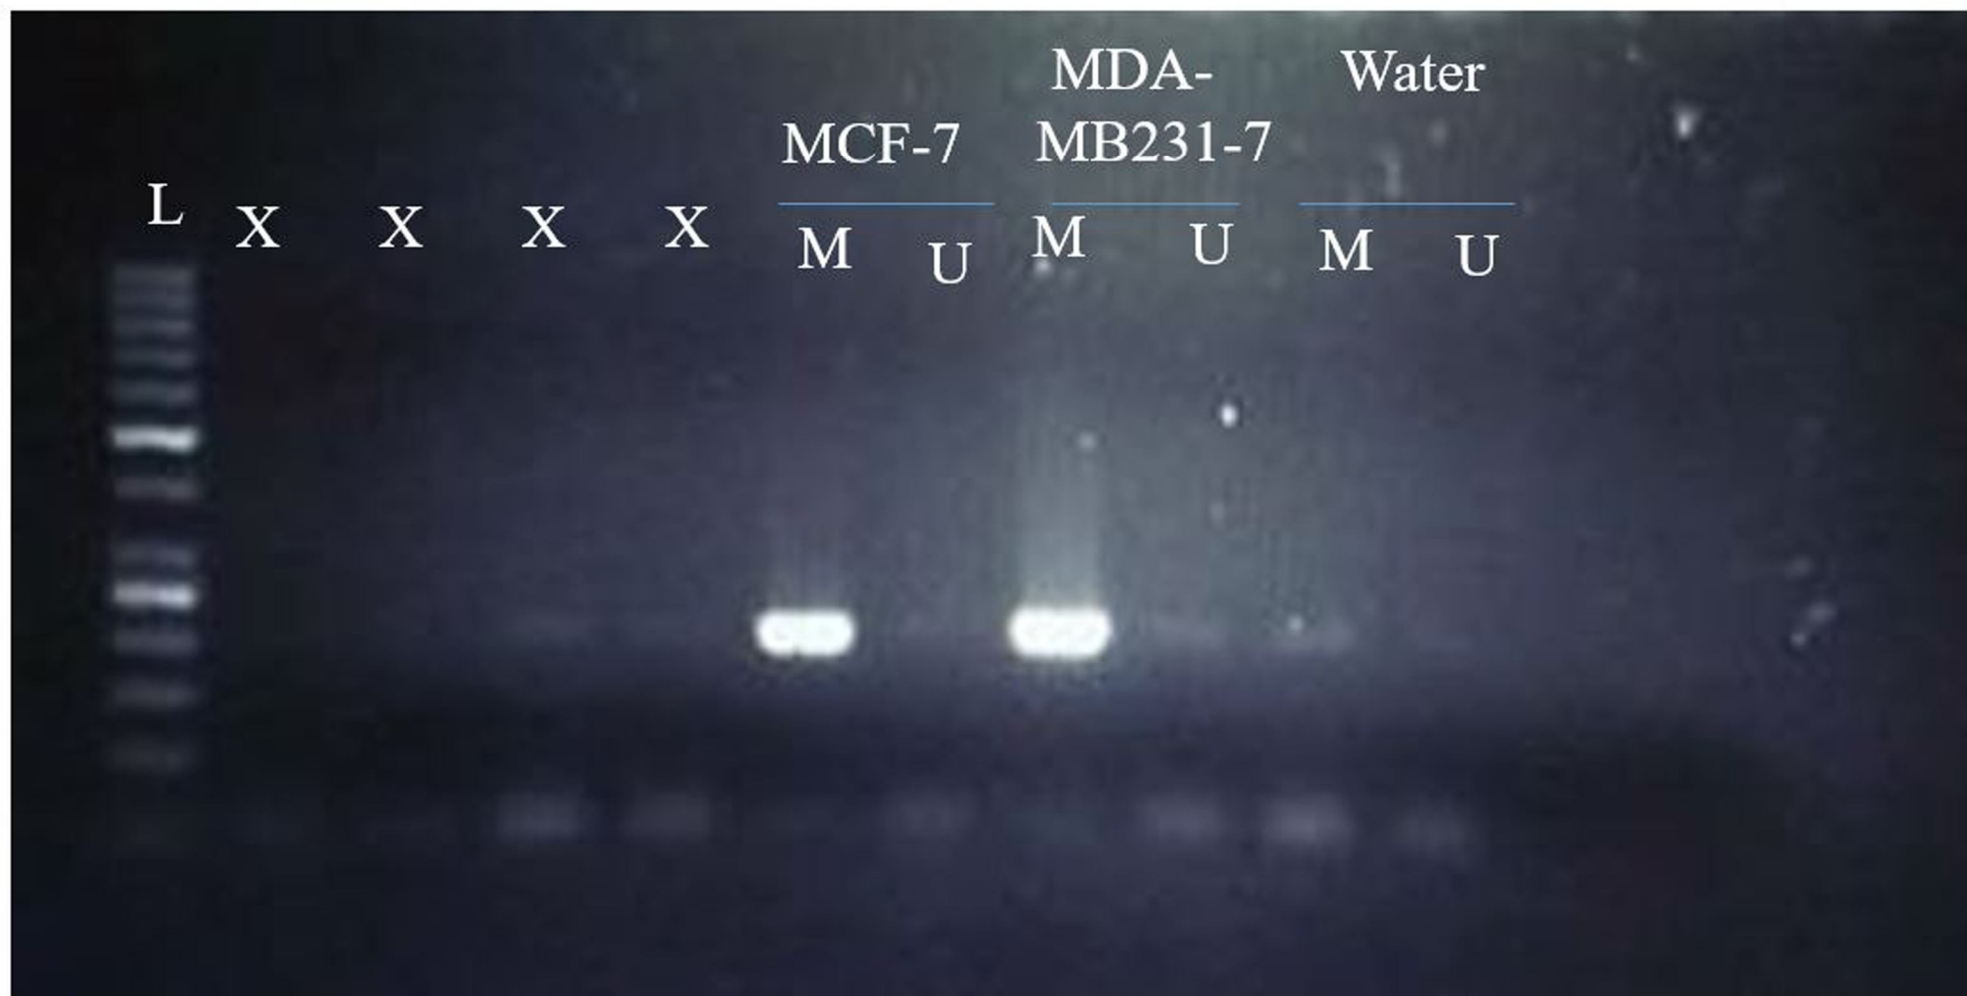

**Figure 2B**

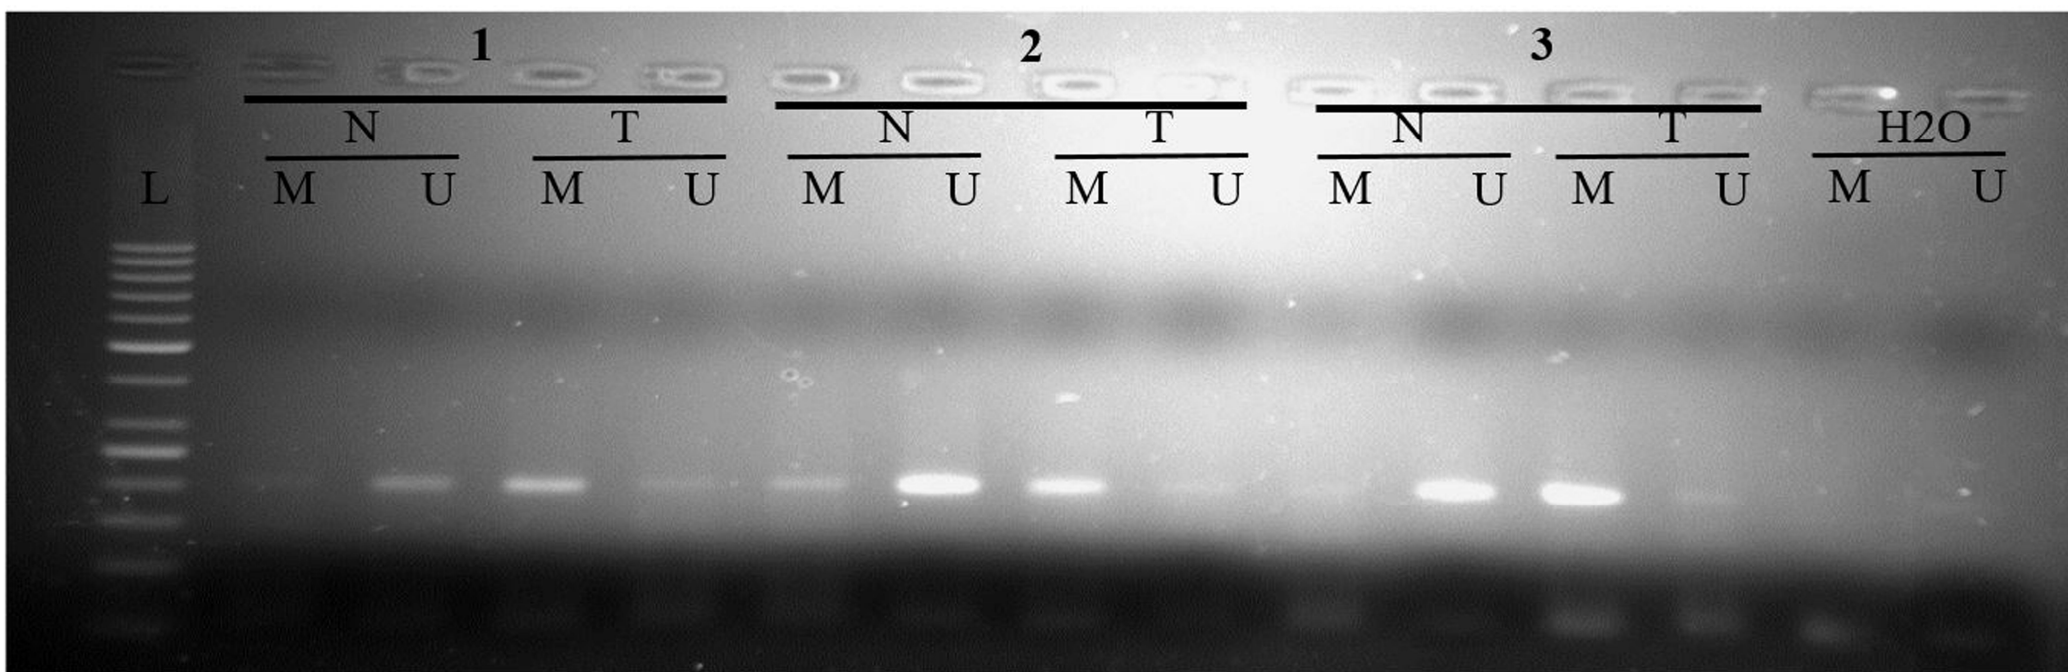

**Figure 3B**

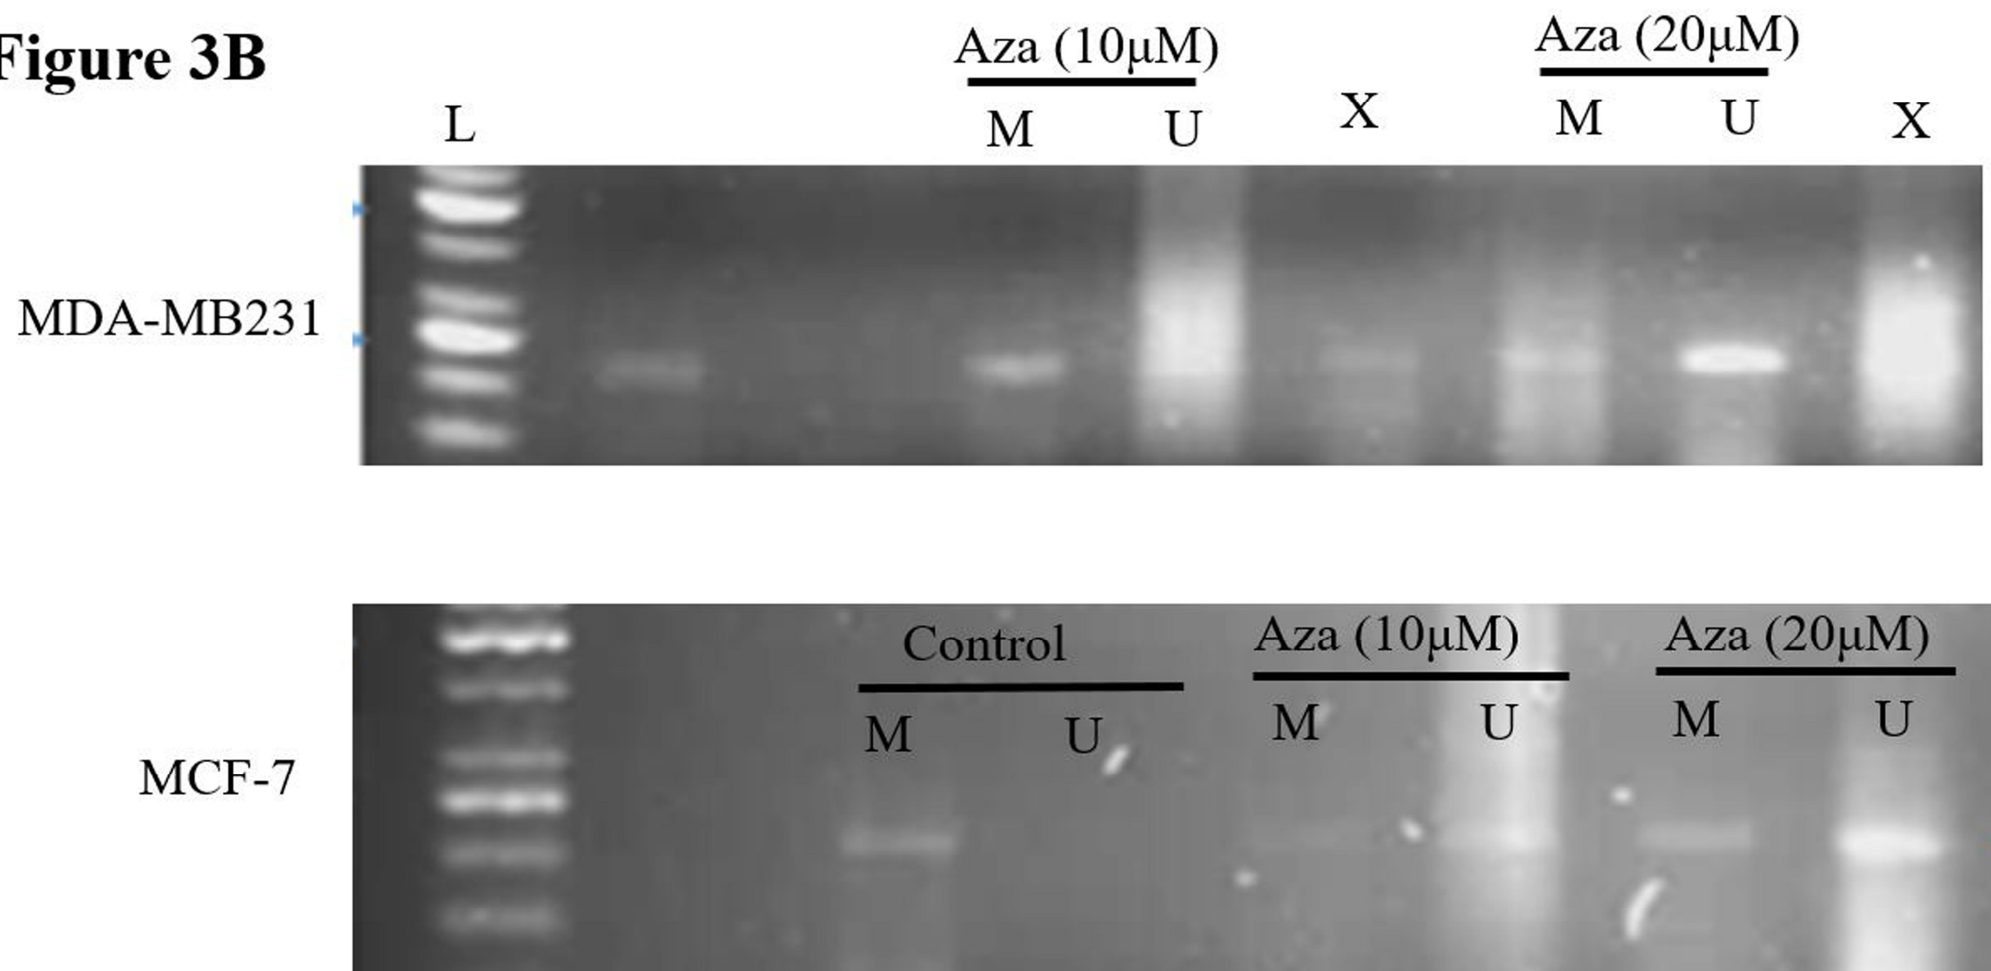

Figure 4A

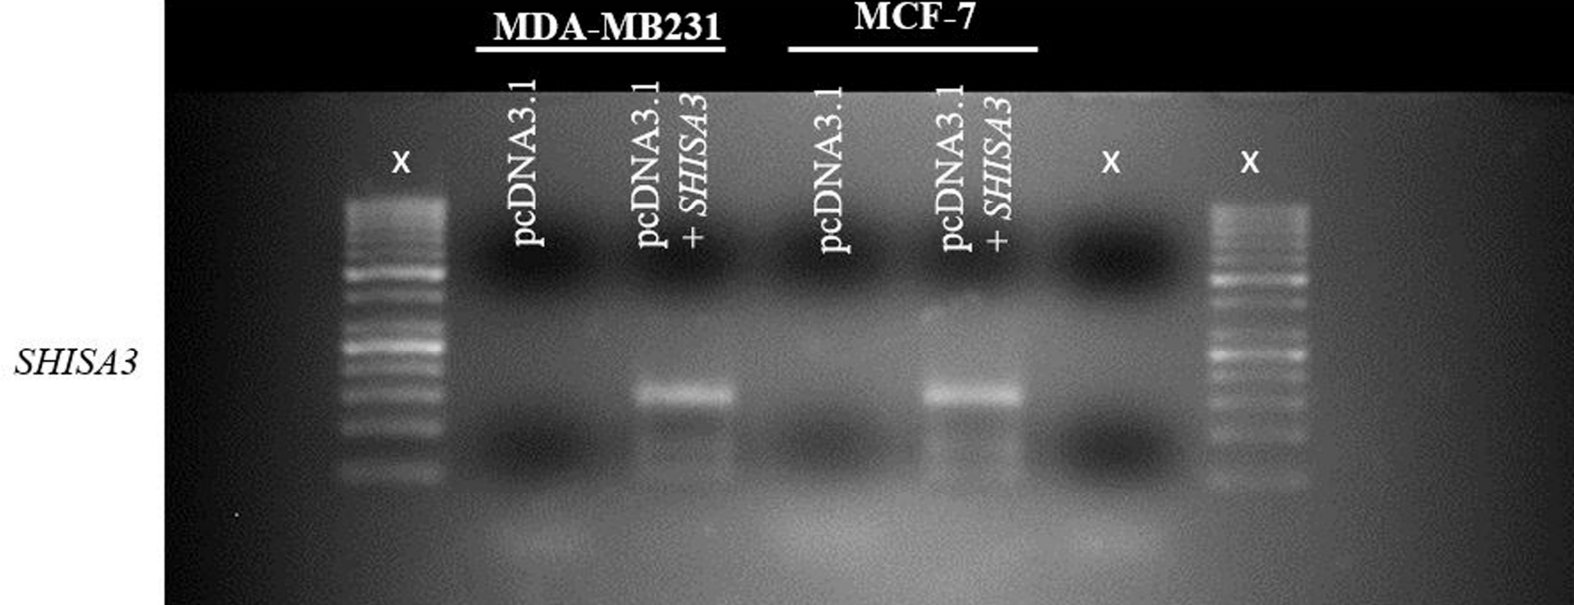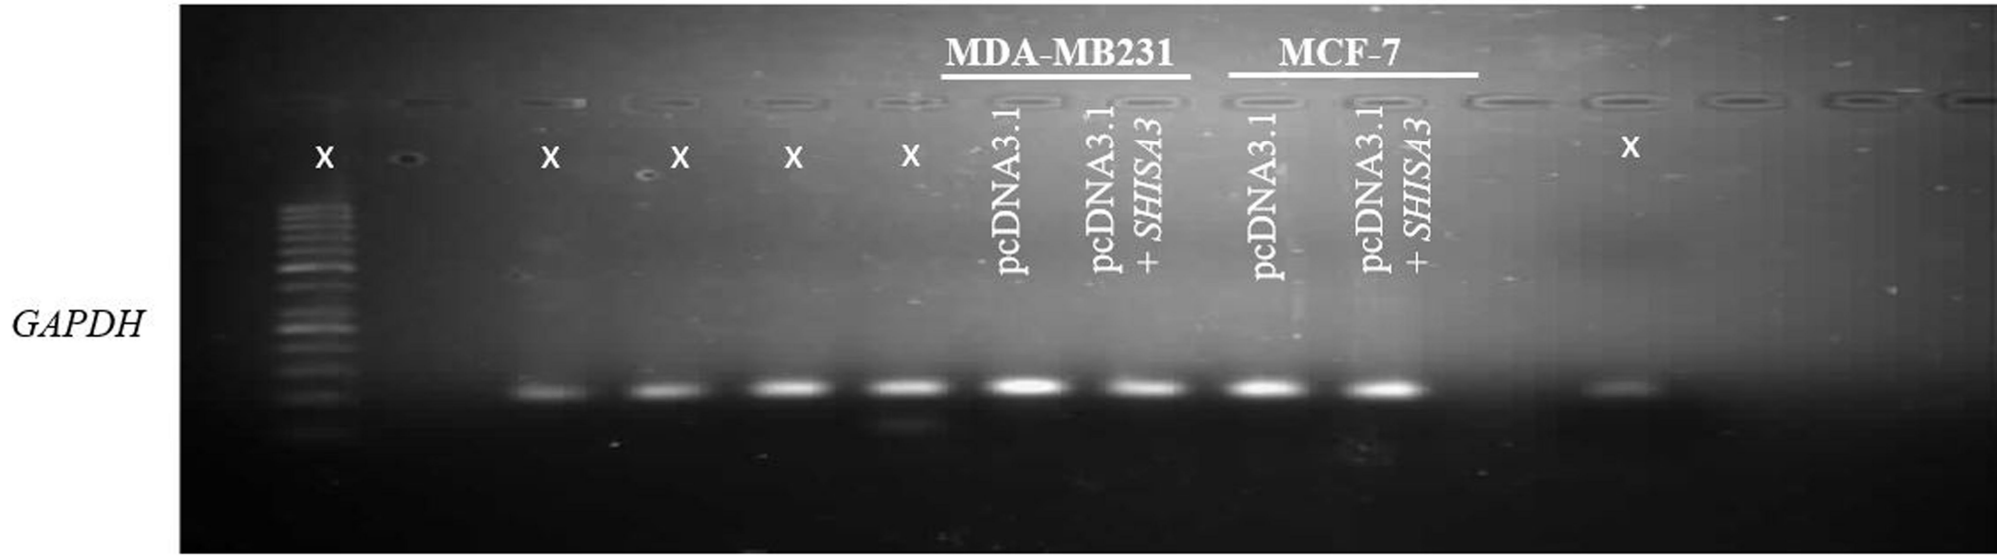

# Supplementary Figure 3

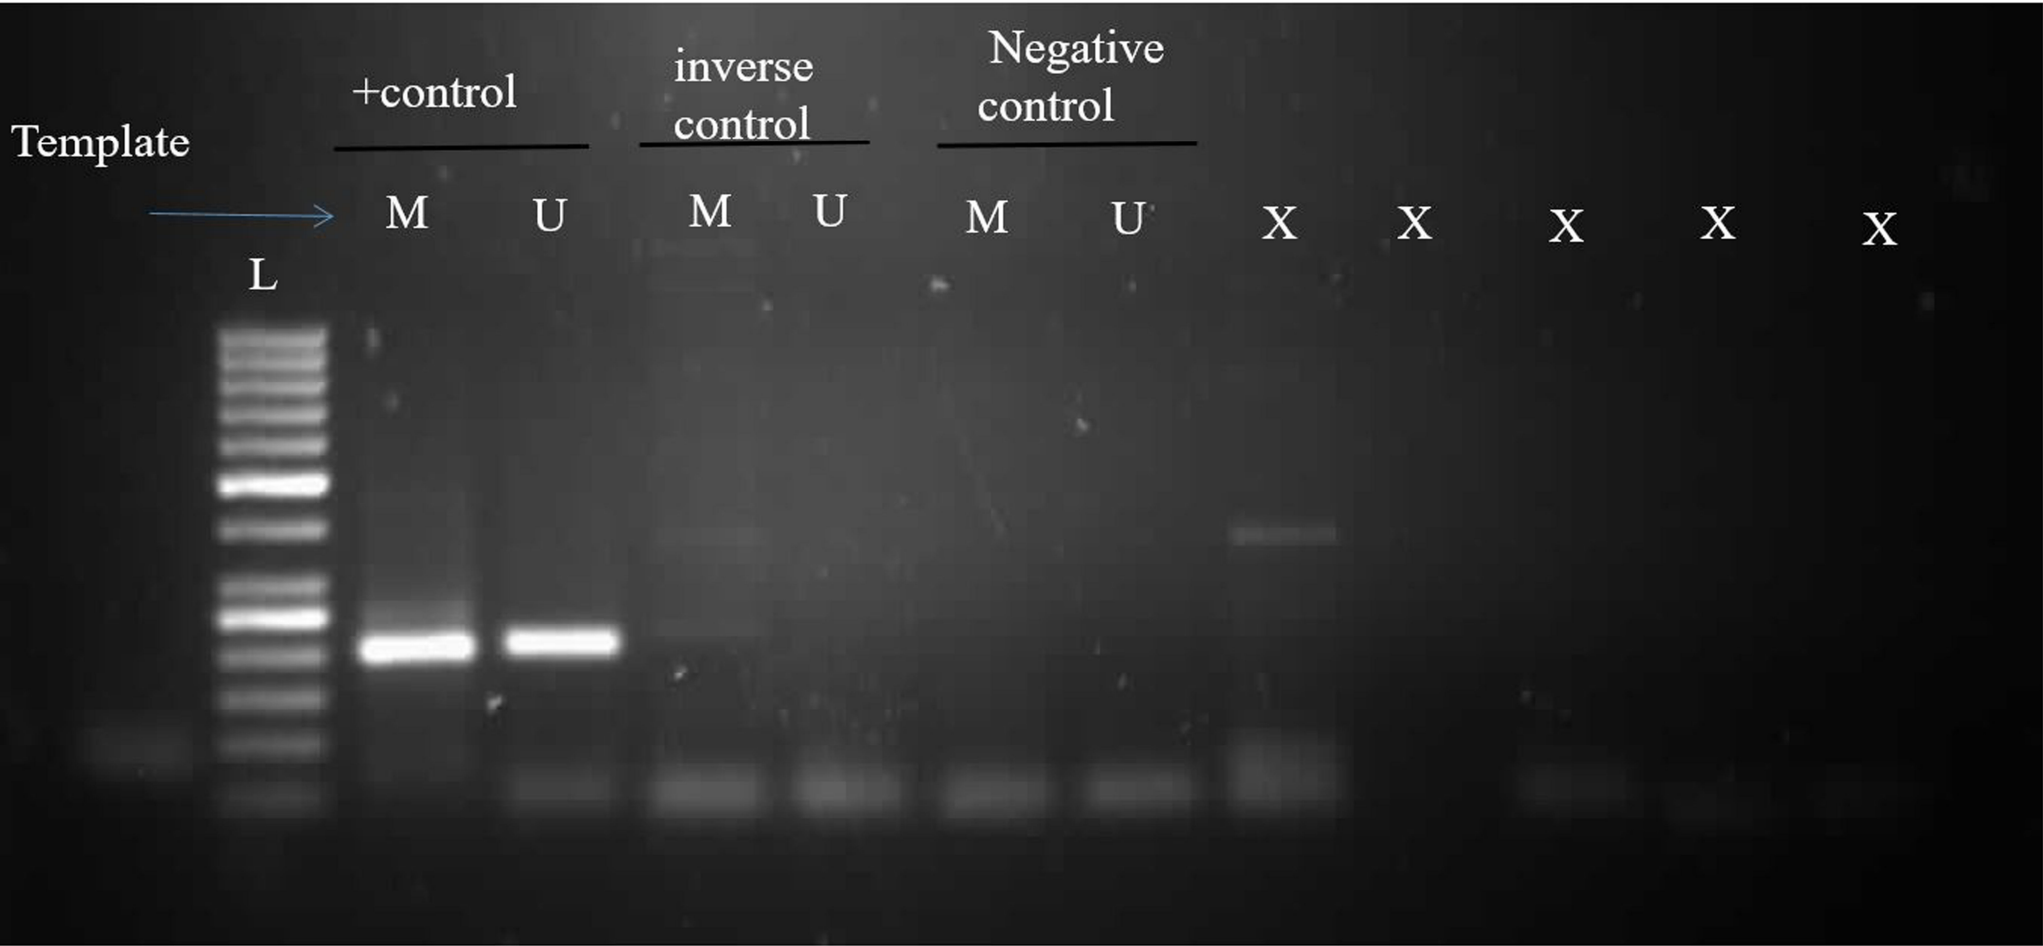

Supplement: pone.0236192.s004.pdf [file pone.0236192.s004.pdf]
